# Supplementary material for: Tracking the Biogenesis and Inheritance of Subpellicular Microtubule inTrypanosoma bruceiwith Inducible YFP-α-Tubulin
Source: Hindawi journal article supplement (doi:10.1155/2014/893272), 2014-01-01

Cell cycle progress

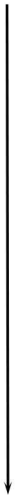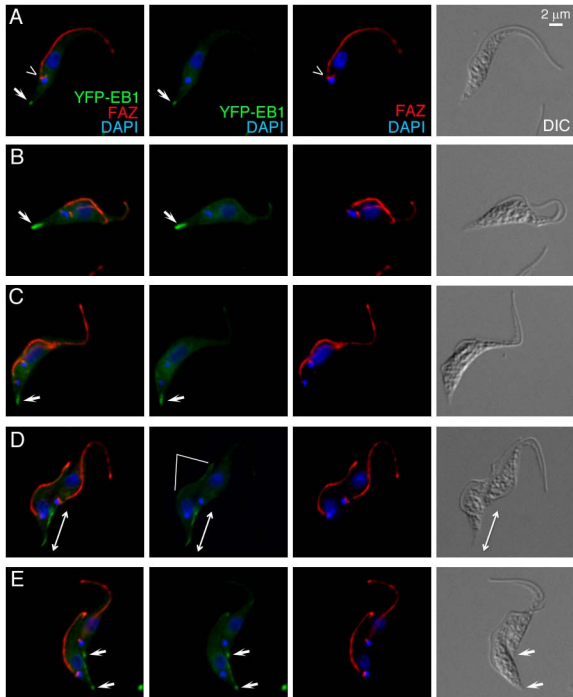

Supplement: f1 [file 893272.f1.pdf]
