# Supplementary material for: Tracking the Biogenesis and Inheritance of Subpellicular Microtubule inTrypanosoma bruceiwith Inducible YFP-α-Tubulin
Source: Hindawi journal article supplement (doi:10.1155/2014/893272), 2014-01-01
Supplement: f2 [file 893272.f2.pdf]

29.13 YFP-EB1  
(control)

kDa

100 —

75 —

50 —

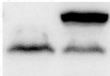

anti-EB1

100 —

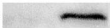

anti-GFP
